# Supplementary material for: Fecal Concentrations of Long-Chain Fatty Acids, Sterols, and Unconjugated Bile Acids in Cats with Chronic Enteropathy
Source: MDPI journal article supplement (doi:10.3390/ani13172753), 2023-08-30
Supplement: s1 [file s1]

| Compound                                | Retention time (min) | Quantitation ions (nominal m/z) | Qualifying ions (nominal m/z [% intensity]) |
|-----------------------------------------|----------------------|---------------------------------|---------------------------------------------|
| myristic acid (14:0)                    | 5.9                  | 229                             | 56[225], 185[28], 271[55]                   |
| palmitic acid (16:0)                    | 6.8                  | 257                             | 312[20], 239[53]                            |
| linoleic acid (18:2, n-6)               | 7.6                  | 263                             | 262[58], 336[26]                            |
| oleic acid (18:1, n-9)                  | 7.6                  | 264                             | 265[98], 222[41], 79[73]                    |
| <i>cis</i> -vaccenic acid (18:1, n-7)   | 7.6                  | 265                             | 264[86], 338[12], 79[116]                   |
| alpha-linolenic acid (18:3, n-3)        | 7.7                  | 261                             | 79[381], 334[67]                            |
| d <sub>4</sub> -stearic acid (ISTD)     | 7.7                  | 289                             | 344[35], 271[48]                            |
| stearic acid (18:0)                     | 7.7                  | 285                             | 340[33]                                     |
| arachidonic acid (20:4, n-6)            | 8.4                  | 292                             | 150[1931], 203[20]                          |
| gondoic acid (20:1, n-9)                | 8.7                  | 293                             | 292[144], 250[34], 366[12]                  |
| erucic acid (22:1, n-9)                 | 10.1                 | 321                             | 320[105], 236[28], 394[93]                  |
| behenic acid (22:0)                     | 10.3                 | 341                             | 396[63], 323[43]                            |
| d <sub>4</sub> -cholestane (ISTD)       | 11.4                 | 361                             | 221[218], 376[76]                           |
| nervonic acid (24:1, n-9)               | 12.3                 | 348                             | 349[88]                                     |
| coprostanol                             | 14.1                 | 370                             | 355[33], 257[21]                            |
| d <sub>6</sub> -cholesterol (ISTD)      | 15.7                 | 464                             | 334[253], 359[70], 374[220]                 |
| cholesterol                             | 15.8                 | 368                             | 353[47], 329[117]                           |
| cholestanol                             | 16.0                 | 445                             | 460[74], 355[87]                            |
| brassicasterol                          | 16.7                 | TIC                             | 470[23], 380[38], 341[23]                   |
| lathosterol                             | 17.0                 | 458                             | 443[26], 213[47]                            |
| campesterol                             | 18.1                 | 343                             | 382[87], 367[42]                            |
| stigmasterol                            | 18.9                 | 484                             | 394[140], 469[21]                           |
| β-sitosterol                            | 20.4                 | 357                             | 396[99], 381[43]                            |
| fucosterol                              | 20.5                 | 386                             | 296[78]                                     |
| d <sub>7</sub> -sitostanol (ISTD)       | 20.6                 | 480                             | 390[59], 405[35]                            |
| sitostanol                              | 20.8                 | 473                             | 488[77], 383[85]                            |
| d <sub>4</sub> -lithocholic acid (ISTD) | 23.4                 | 219                             | 261[77]                                     |
| lithocholic acid                        | 23.4                 | 215                             | 257[92]                                     |
| deoxycholic acid                        | 25.2                 | 255                             | 256[21], 250[16]                            |
| d <sub>4</sub> -cholic acid (ISTD)      | 26.1                 | 257                             | 414[90]                                     |
| chenodeoxycholic acid                   | 26.0                 | 412                             | 255[80], 397[28]                            |
| cholic acid                             | 26.1                 | 253                             | 410[62], 500[31]                            |
| ursodeoxycholic acid                    | 27.5                 | 502                             | 503[31]                                     |

**Supplementary Table S1.** Targeted compounds in the GC-MS assay and the characteristics of the ion fragments used for quantification and qualification, ordered by increasing retention time. Number of carbons, number of double bonds, and position of double bonds were specified for fatty acids. ISTD: deuterated internal standard.

| Compound                  | Min<br>(µg/<br>mL) | Max<br>(µg/<br>mL) | R <sup>2</sup> | curve fit and<br>weighting factor | intra-assay<br>variation CV% | inter-assay<br>variation CV% |
|---------------------------|--------------------|--------------------|----------------|-----------------------------------|------------------------------|------------------------------|
| myristic acid             | 1.6                | 200                | 99.9           | QE                                | 1.7                          | 2.4                          |
| palmitic acid             | 3.9                | 1000               | 99.4           | QE                                | 1.1                          | 1.2                          |
| linoleic acid             | 7.8                | 1000               | 99.7           | QI                                | 1.9                          | 1.0                          |
| oleic acid                | 7.8                | 1000               | 99.0           | QI                                | 4.8                          | 4.1                          |
| <i>cis</i> -vaccenic acid | 3.1                | 400                | 99.4           | QI                                | 1.6                          | 4.9                          |
| alpha-linolenic acid      | 0.8                | 200                | 99.9           | QE                                | 4.0                          | 10.0                         |
| stearic acid              | 7.8                | 1000               | 99.8           | QI                                | 1.1                          | 1.1                          |
| arachidonic acid          | 3.1                | 400                | 99.9           | QE                                | 3.0                          | 4.9                          |
| gondoic acid              | 1.6                | 100                | 99.9           | QI                                | 2.2                          | 3.8                          |
| erucic acid               | 0.8                | 100                | 99.9           | QI                                | 2.8                          | 7.5                          |
| behenic acid              | 1.6                | 200                | 99.9           | QI                                | 6.9                          | 7.6                          |
| nervonic acid             | 1.6                | 200                | 99.9           | QI                                | 4.3                          | 10.1                         |
| coprostanol               | 0.8                | 200                | 99.9           | QI                                | 3.5                          | 5.2                          |
| cholesterol               | 3.1                | 800                | 99.9           | QI                                | 1.3                          | 1.4                          |
| cholestanol               | 0.8                | 100                | 99.9           | QE                                | 2.4                          | 3.2                          |
| brassicasterol            | 0.8                | 100                | 99.9           | QI                                | 2.6                          | 3.9                          |
| lathosterol               | 0.8                | 50                 | 99.7           | QI                                | 2.6                          | 1.2                          |
| campesterol               | 1.6                | 200                | 99.9           | QI                                | 1.7                          | 4.6                          |
| stigmasterol              | 1.6                | 100                | 99.9           | QI                                | 2.4                          | 6.1                          |
| β-sitosterol              | 6.3                | 400                | 99.9           | QE                                | 1.7                          | 1.1                          |
| fucosterol                | 0.8                | 100                | 99.9           | QE                                | 1.3                          | 1.0                          |
| sitostanol                | 1.6                | 200                | 99.9           | LI                                | 1.6                          | 2.2                          |
| lithocholic acid          | 2.0                | 250                | 99.8           | QI                                | 4.9                          | 12.4                         |
| deoxycholic acid          | 4.0                | 500                | 99.9           | QE                                | 3.8                          | 12.6                         |
| chenodeoxycholic acid     | 0.8                | 100                | 99.9           | QI                                | 4.3                          | 9.3                          |
| cholic acid               | 2.0                | 800                | 99.9           | QI                                | 0.8                          | 6.1                          |
| ursodeoxycholic acid      | 0.4                | 50                 | 99.6           | QE                                | 5.6                          | 11.9                         |

**Supplementary Table S2.** The validation results of GC-MS method to quantify targeted lipid compounds. min: minimum concentrations of the standard curve; max: maximum concentrations of the standard curve; Q: quadratic regression; L: linear regression; E: equal weighting; I: inverse of concentration weighting.

| Compound                         | PubChem CID | Common name                                      | IUPAC name                                                                                                                                                                      |
|----------------------------------|-------------|--------------------------------------------------|---------------------------------------------------------------------------------------------------------------------------------------------------------------------------------|
| myristic acid (14:0)             | 11005       | n-tetradecanoic acid, crodacid                   | tetradecanoic acid                                                                                                                                                              |
| palmitic acid (16:0)             | 985         | cetylic acid                                     | hexadecanoic acid                                                                                                                                                               |
| linoleic acid (18:2, n-6)        | 5280450     | linolic acid, telfairic acid                     | (9Z,12Z)-octadeca-9,12-dienoic acid                                                                                                                                             |
| oleic acid (18:1, n-9)           | 445639      | cis-9-octadecenoic acid, oleate                  | (Z)-octadec-9-enoic acid                                                                                                                                                        |
| cis-vaccenic acid (18:1, n-7)    | 5282761     | cis-11-octadecenoic acid, asclepic acid          | (Z)-octadec-11-enoic acid                                                                                                                                                       |
| alpha-linolenic acid (18:3, n-3) | 5280934     | linolenic acid, linolenate                       | (9Z,12Z,15Z)-octadeca-9,12,15-trienoic acid                                                                                                                                     |
| stearic acid (18:0)              | 5281        | n-octadecanoic acid, stearophanic acid           | octadecanoic acid                                                                                                                                                               |
| arachidonic acid (20:4, n-6)     | 444899      | arachidonate, immunocytophyte                    | (5Z,8Z,11Z,14Z)-icosa-5,8,11,14-tetraenoic acid                                                                                                                                 |
| gondoic acid (20:1, n-9)         | 5282768     | cis-11-eicosenoic acid, 11-eicosenoic acid       | (Z)-icos-11-enoic acid                                                                                                                                                          |
| erucic acid (22:1, n-9)          | 5281116     | cis-13-docosenoic acid, 13-docosenoic acid       | (Z)-docos-13-enoic acid                                                                                                                                                         |
| behenic acid (22:0)              | 8215        | 1-docosanoic acid                                | docosanoic acid                                                                                                                                                                 |
| nervonic acid (24:1, n-9)        | 5281120     | cis-15-tetracosenoic acid, selacholeic acid      | (Z)-tetracos-15-enoic acid                                                                                                                                                      |
| coprostanol                      | 221122      | coprosterol, stercorin                           | (3S,5R,8R,9S,10S,13R,14S,17R)-10,13-dimethyl-17-[(2R)-6-methylheptan-2-yl]-2,3,4,5,6,7,8,9,11,12,14,15,16,17-tetradecahydro-1H-cyclopenta[a]phenanthren-3-ol                    |
| cholesterol                      | 5997        | cholesterin, cholestrin                          | (3S,8S,9S,10R,13R,14S,17R)-10,13-dimethyl-17-[(2R)-6-methylheptan-2-yl]-2,3,4,7,8,9,11,12,14,15,16,17-dodecahydro-1H-cyclopenta[a]phenanthren-3-ol                              |
| cholestanol                      | 6665        | dehydrocholesterol, beta-cholestanol, zymostanol | (3S,5S,8R,9S,10S,13R,14S,17R)-10,13-dimethyl-17-[(2R)-6-methylheptan-2-yl]-2,3,4,5,6,7,8,9,11,12,14,15,16,17-tetradecahydro-1H-cyclopenta[a]phenanthren-3-ol                    |
| brassicasterol                   | 5281327     | brassicasterin                                   | (3S,8S,9S,10R,13R,14S,17R)-17-[(E,2R,5R)-5,6-dimethylhept-3-en-2-yl]-10,13-dimethyl-2,3,4,7,8,9,11,12,14,15,16,17-dodecahydro-1H-cyclopenta[a]phenanthren-3-ol                  |
| lathosterol                      | 65728       | gamma-cholesterol                                | (3S,5S,9R,10S,13R,14R,17R)-10,13-dimethyl-17-[(2R)-6-methylheptan-2-yl]-2,3,4,5,6,9,11,12,14,15,16,17-dodecahydro-1H-cyclopenta[a]phenanthren-3-ol                              |
| campesterol                      | 173183      | campesterin                                      | (3S,8S,9S,10R,13R,14S,17R)-17-[(2R,5R)-5,6-dimethylheptan-2-yl]-10,13-dimethyl-2,3,4,7,8,9,11,12,14,15,16,17-dodecahydro-1H-cyclopenta[a]phenanthren-3-ol                       |
| stigmasterol                     | 5280794     | beta-stigmasterol, stigmasterin                  | (3S,8S,9S,10R,13R,14S,17R)-17-[(E,2R,5S)-5-ethyl-6-methylhept-3-en-2-yl]-10,13-dimethyl-2,3,4,7,8,9,11,12,14,15,16,17-dodecahydro-1H-cyclopenta[a]phenanthren-3-ol              |
| β-sitosterol                     | 222284      | sitosterol, cupreol, azuprostat                  | (3S,8S,9S,10R,13R,14S,17R)-17-[(2R,5R)-5-ethyl-6-methylheptan-2-yl]-10,13-dimethyl-2,3,4,7,8,9,11,12,14,15,16,17-dodecahydro-1H-cyclopenta[a]phenanthren-3-ol                   |
| fucosterol                       | 5281328     | fucosterin, (24e)-24-n-propylidenecholesterol    | (3S,8S,9S,10R,13R,14S,17R)-10,13-dimethyl-17-[(E,2R)-5-propan-2-ylhept-5-en-2-yl]-2,3,4,7,8,9,11,12,14,15,16,17-dodecahydro-1H-cyclopenta[a]phenanthren-3-ol                    |
| sitostanol                       | 241572      | stigmastanol, fucostanol, spinastanol            | (3S,5S,8R,9S,10S,13R,14S,17R)-17-[(2R,5R)-5-ethyl-6-methylheptan-2-yl]-10,13-dimethyl-2,3,4,5,6,7,8,9,11,12,14,15,16,17-tetradecahydro-1H-cyclopenta[a]phenanthren-3-ol         |
| lithocholic acid                 | 9903        | 3alpha-hydroxy-5beta-cholan-24-oic acid          | (4R)-4-[(3R,5R,8R,9S,10S,13R,14S,17R)-3-hydroxy-10,13-dimethyl-2,3,4,5,6,7,8,9,11,12,14,15,16,17-tetradecahydro-1H-cyclopenta[a]phenanthren-17-yl]pentanoic acid                |
| deoxycholic acid                 | 222528      | deoxycholate, desoxycholic acid, cholerebic      | (4R)-4-[(3R,5R,8R,9S,10S,12S,13R,14S,17R)-3,12-dihydroxy-10,13-dimethyl-2,3,4,5,6,7,8,9,11,12,14,15,16,17-tetradecahydro-1H-cyclopenta[a]phenanthren-17-yl]pentanoic acid       |
| chenodeoxycholic acid            | 10133       | chenodiol, chenic acid                           | (4R)-4-[(3R,5S,7R,8R,9S,10S,13R,14S,17R)-3,7-dihydroxy-10,13-dimethyl-2,3,4,5,6,7,8,9,11,12,14,15,16,17-tetradecahydro-1H-cyclopenta[a]phenanthren-17-yl]pentanoic acid         |
| cholic acid                      | 221493      | cholate, cholalic acid                           | (4R)-4-[(3R,5S,7R,8R,9S,10S,12S,13R,14S,17R)-3,7,12-trihydroxy-10,13-dimethyl-2,3,4,5,6,7,8,9,11,12,14,15,16,17-tetradecahydro-1H-cyclopenta[a]phenanthren-17-yl]pentanoic acid |
| ursodeoxycholic acid             | 31401       | ursodiol, actigall, ursodeoxycholate             | (4R)-4-[(3R,5S,7S,8R,9S,10S,13R,14S,17R)-3,7-dihydroxy-10,13-dimethyl-2,3,4,5,6,7,8,9,11,12,14,15,16,17-tetradecahydro-1H-cyclopenta[a]phenanthren-17-yl]pentanoic acid         |

**Supplementary Table S3.** Targeted compounds in the GC-MS assay and their PubChem CID, common name, and IUPAC name.

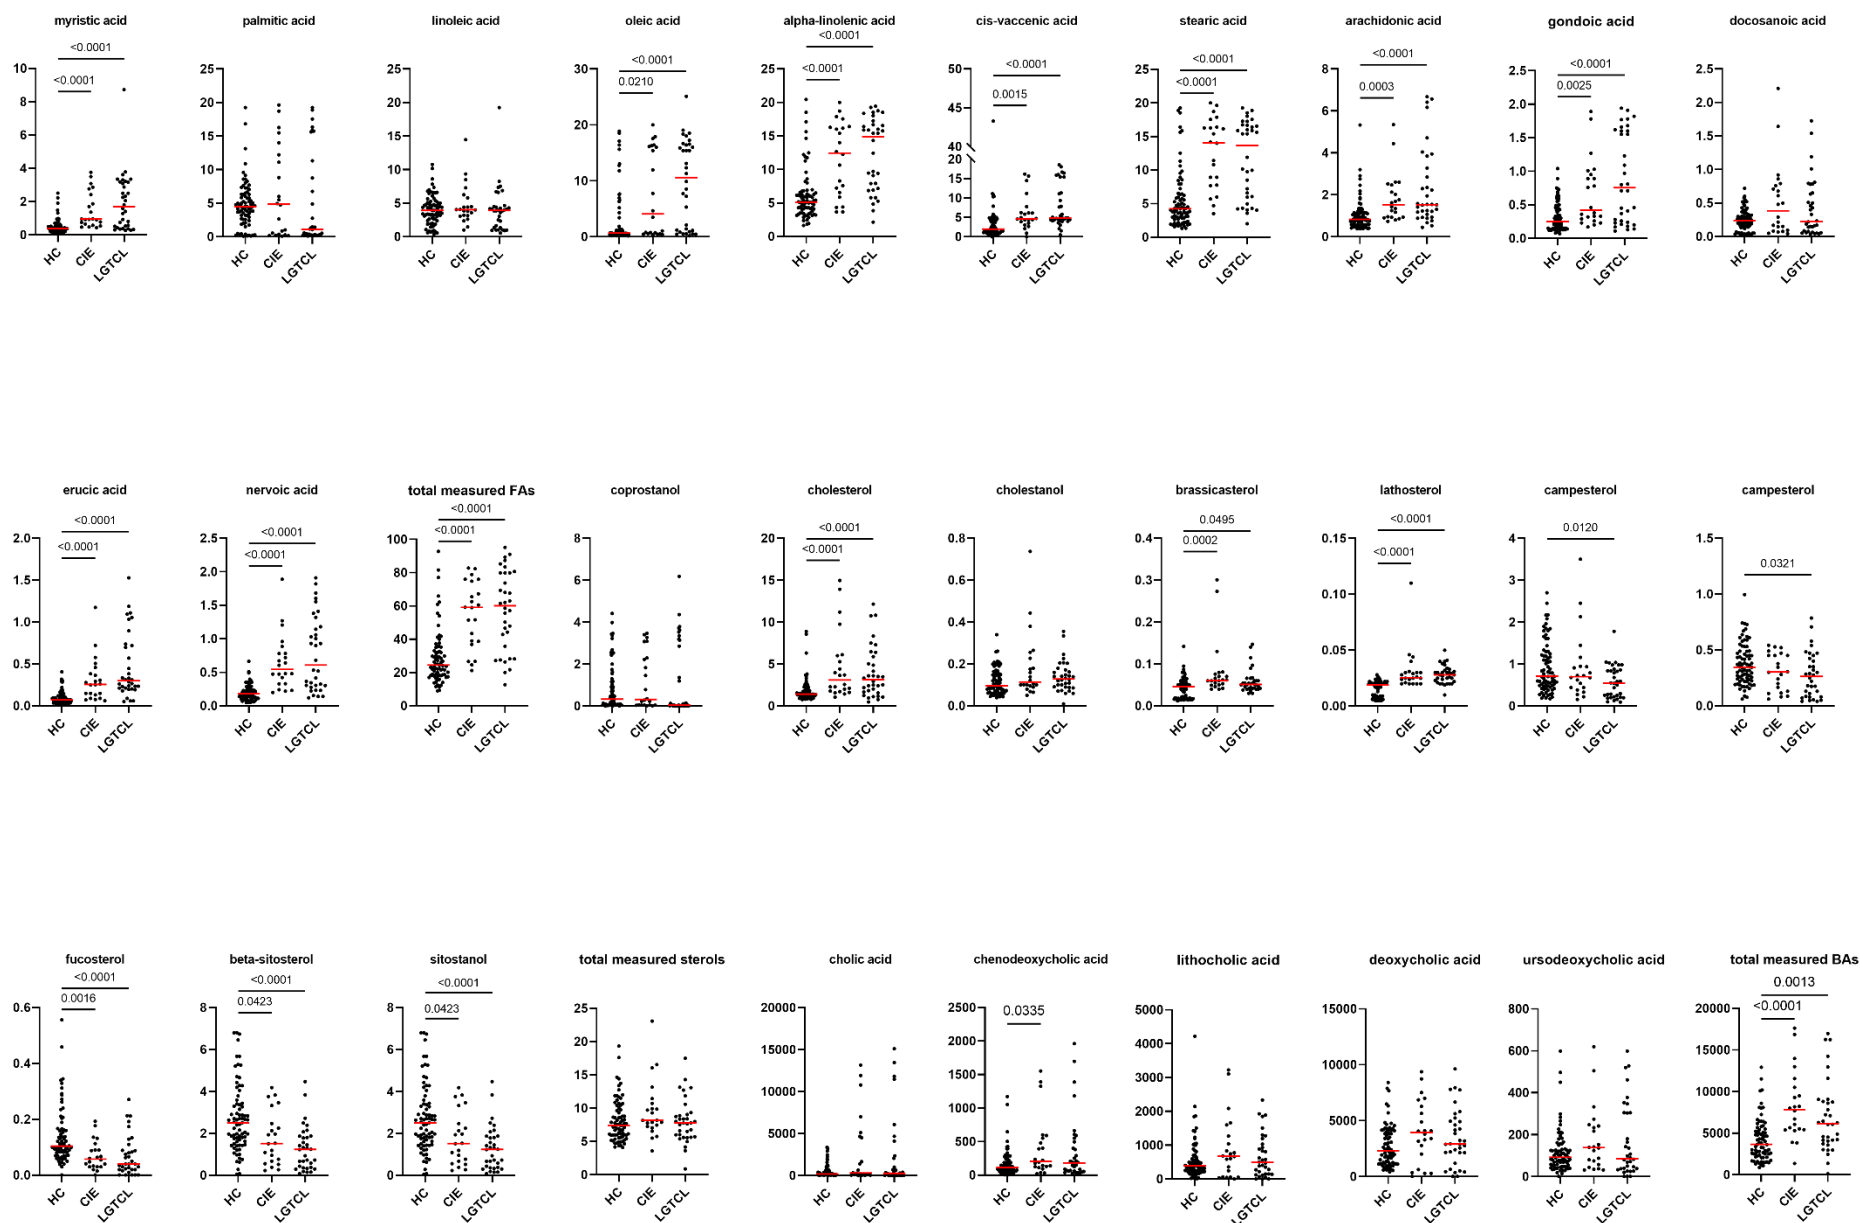

**Supplementary Figure S1.** Fecal concentrations of targeted compounds in healthy cats (HC), cats with chronic inflammatory enteropathy (CIE, IBD), and cats with low-grade intestinal T-cell lymphoma (LG TCL). Red lines represent medians. Unit for fatty acids and sterols ( $\mu\text{g}/\text{mg}$ ); unit for bile acids ( $\text{ng}/\text{mg}$ ). The p-values shown in the figures are unadjusted P-values.
